# Supplementary material for: New insights into 3M3M1B: the role of water in ˙OH-initiated degradation and aerosol formation in the presence of NOX (X = 1, 2) and an alkali
Source: Royal Society of Chemistry journal article supplement (doi:10.1039/c9cp02793a), 2019-01-01
Supplement: c9cp02793a1.pdf [file c9cp02793a1.pdf]

## Supporting Information for:

# **New insights into 3M3M1B: roles of water on the ·OH-initiated degradation and aerosol formation in the presence of NO<sub>x</sub> (X=1, 2) and alkali**

Feng-Yang Bai<sup>a</sup>, Shuang Ni<sup>b</sup>, Yi-Zhen Tang<sup>c</sup>, Xiu-Mei Pan<sup>b\*</sup>, and Zhen Zhao<sup>a</sup>

<sup>a</sup>Institute of Catalysis for Energy and Environment, College of Chemistry and Chemical Engineering, Shenyang Normal University, Shenyang, Liaoning, 110034, People's Republic of China

<sup>b</sup>National & Local United Engineering Lab for Power Battery, Faculty of Chemistry, Northeast Normal University, Changchun 130024, People's Republic of China

<sup>c</sup>School of Environmental and Municipal Engineering, Qingdao Technological University, Qingdao 266033, People's Republic of China

---

\*Corresponding author: [panxm460@nenu.edu.cn](mailto:panxm460@nenu.edu.cn) (X-M Pan)

**Table S1.** Calculated rate constants at different temperatures (in K) and heights (in km) in the Earth atmosphere (in  $\text{cm}^3 \text{molecule}^{-1}\text{s}^{-1}$ ).

| $T$ | Altitude | $k_1$    | $k_2$    | $k_3$    | $k_4$    | $k_5$    | $k_6$    | $k$             |
|-----|----------|----------|----------|----------|----------|----------|----------|-----------------|
| 200 | 12       | 5.40E-14 | 6.43E-12 | 3.54E-13 | 2.10E-13 | 2.36E-12 | 6.23E-12 | 1.56E-11        |
| 217 | 10       | 5.50E-14 | 6.72E-12 | 3.83E-13 | 2.10E-13 | 2.65E-12 | 6.06E-12 | 1.61E-11        |
| 223 | 9        | 5.55E-14 | 6.83E-12 | 3.94E-13 | 2.10E-13 | 2.77E-12 | 6.02E-12 | 1.63E-11        |
| 230 | 8        | 5.61E-14 | 6.97E-12 | 4.06E-13 | 2.10E-13 | 2.90E-12 | 6.00E-12 | 1.65E-11        |
| 236 | 7        | 5.66E-14 | 7.10E-12 | 4.18E-13 | 2.11E-13 | 3.02E-12 | 5.99E-12 | 1.68E-11        |
| 243 | 6        | 5.73E-14 | 7.25E-12 | 4.31E-13 | 2.12E-13 | 3.17E-12 | 5.99E-12 | 1.71E-11        |
| 249 | 5        | 5.79E-14 | 7.38E-12 | 4.42E-13 | 2.12E-13 | 3.30E-12 | 6.00E-12 | 1.74E-11        |
| 256 | 4        | 5.86E-14 | 7.55E-12 | 4.56E-13 | 2.13E-13 | 3.45E-12 | 6.02E-12 | 1.77E-11        |
| 262 | 3        | 5.93E-14 | 7.69E-12 | 4.68E-13 | 2.14E-13 | 3.59E-12 | 6.05E-12 | 1.81E-11        |
| 269 | 2        | 6.02E-14 | 7.87E-12 | 4.83E-13 | 2.16E-13 | 3.76E-12 | 6.09E-12 | 1.85E-11        |
| 275 | 1        | 6.09E-14 | 8.02E-12 | 4.96E-13 | 2.17E-13 | 3.90E-12 | 6.13E-12 | 1.88E-11        |
| 282 | 0        | 6.18E-14 | 8.21E-12 | 5.11E-13 | 2.19E-13 | 4.08E-12 | 6.19E-12 | 1.93E-11        |
| 288 | 0        | 6.26E-14 | 8.38E-12 | 5.24E-13 | 2.20E-13 | 4.23E-12 | 6.24E-12 | 1.97E-11        |
| 296 | 0        | 6.37E-14 | 8.60E-12 | 5.42E-13 | 2.23E-13 | 4.45E-12 | 6.32E-12 | 2.02E-11        |
|     |          |          |          |          |          |          |          | (1.64±0.18)E-11 |
| 298 | 0        | 6.40E-14 | 8.66E-12 | 5.47E-13 | 2.23E-13 | 6.34E-12 | 4.5E-12  | 2.03E-11        |

**Table S2.** Predicted acute and chronic toxicity of 3M3M1B and the main products of hydroxylation of 3M3M1B. The GHS classification LC<sub>50</sub>, EC<sub>50</sub>, and ChV units are mgL<sup>-1</sup>.

| Compound                                                               | Acute toxicity (mg/L)    |                             |                                 | Chronic toxicity (ChV) (mg/L) |         |             |
|------------------------------------------------------------------------|--------------------------|-----------------------------|---------------------------------|-------------------------------|---------|-------------|
|                                                                        | Fish (LC <sub>50</sub> ) | Daphnid (LC <sub>50</sub> ) | Green Algae (EC <sub>50</sub> ) | Fish                          | Daphnid | Green Algae |
| 3M3M1B                                                                 | 2367.28                  | 1165.51                     | 481.44                          | 195.57                        | 76.43   | 91.77       |
| CH <sub>3</sub> OC(CH <sub>3</sub> ) <sub>2</sub> CH <sub>2</sub> CHO  | 44.03                    | 155.36                      | 166.18                          | 12.36                         | 16.85   | 42.57       |
| CH <sub>3</sub> OC(CH <sub>3</sub> ) <sub>2</sub> CH <sub>2</sub> COOH | 16521.57                 | 8307.30                     | 3743.55                         | 1399.20                       | 577.62  | 747.86      |

<sup>A</sup> R=-C(CH<sub>3</sub>)<sub>2</sub>OCH<sub>3</sub>

Not harmful    
  Harmful    
  Toxic

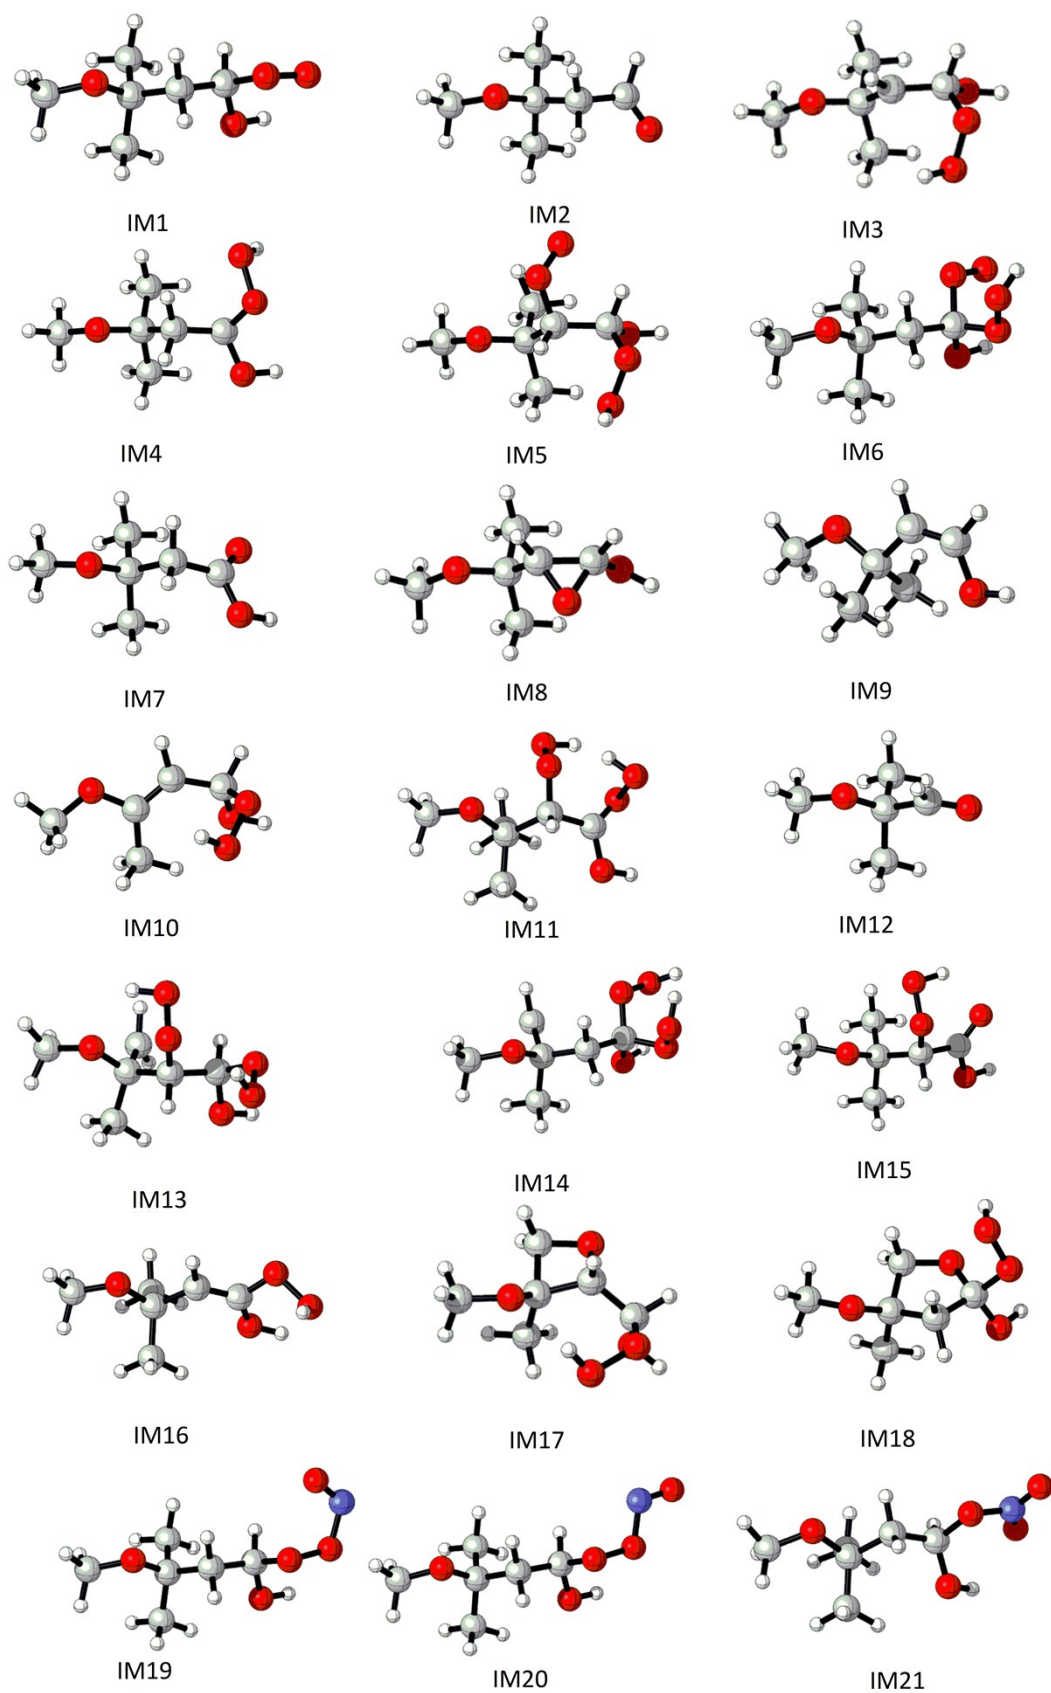

**Figure S1.** The geometries for the stationary points and transition states in gaseous phase involving the subsequent degradation of subsequent behaviors of peroxy radical in the absence and presence of NO.

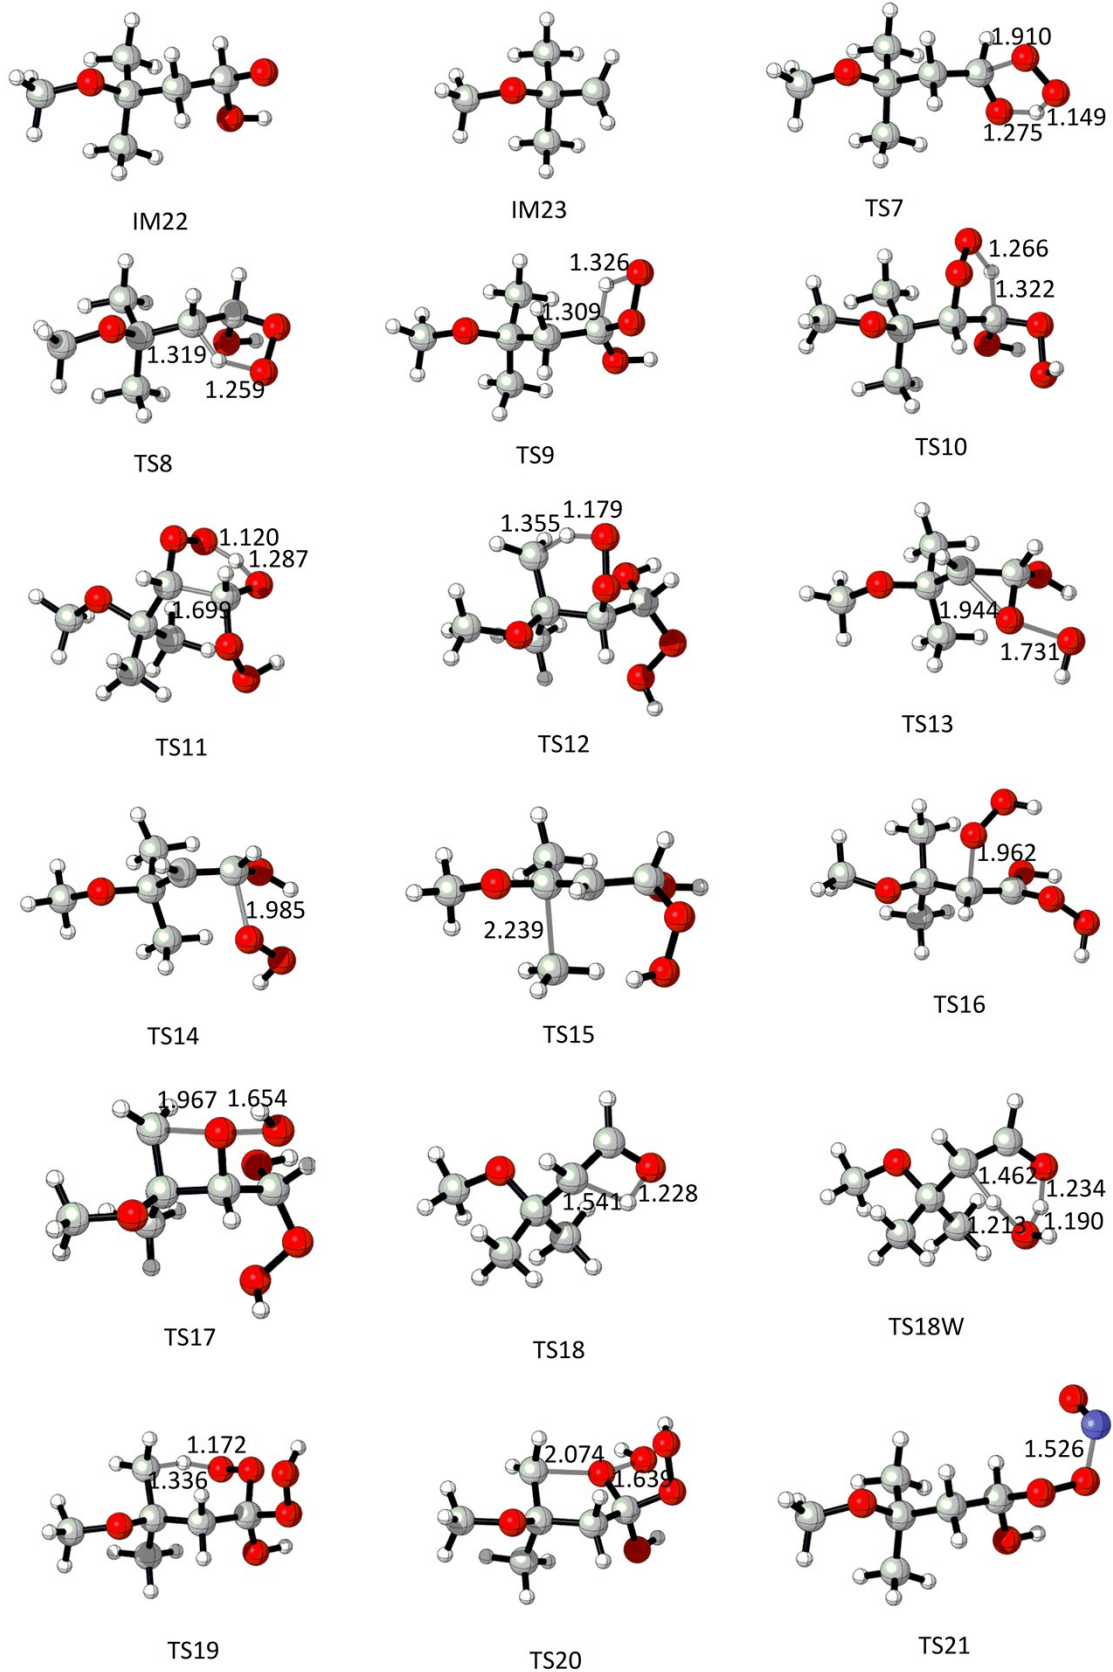

**Figure S1.** (Continued)

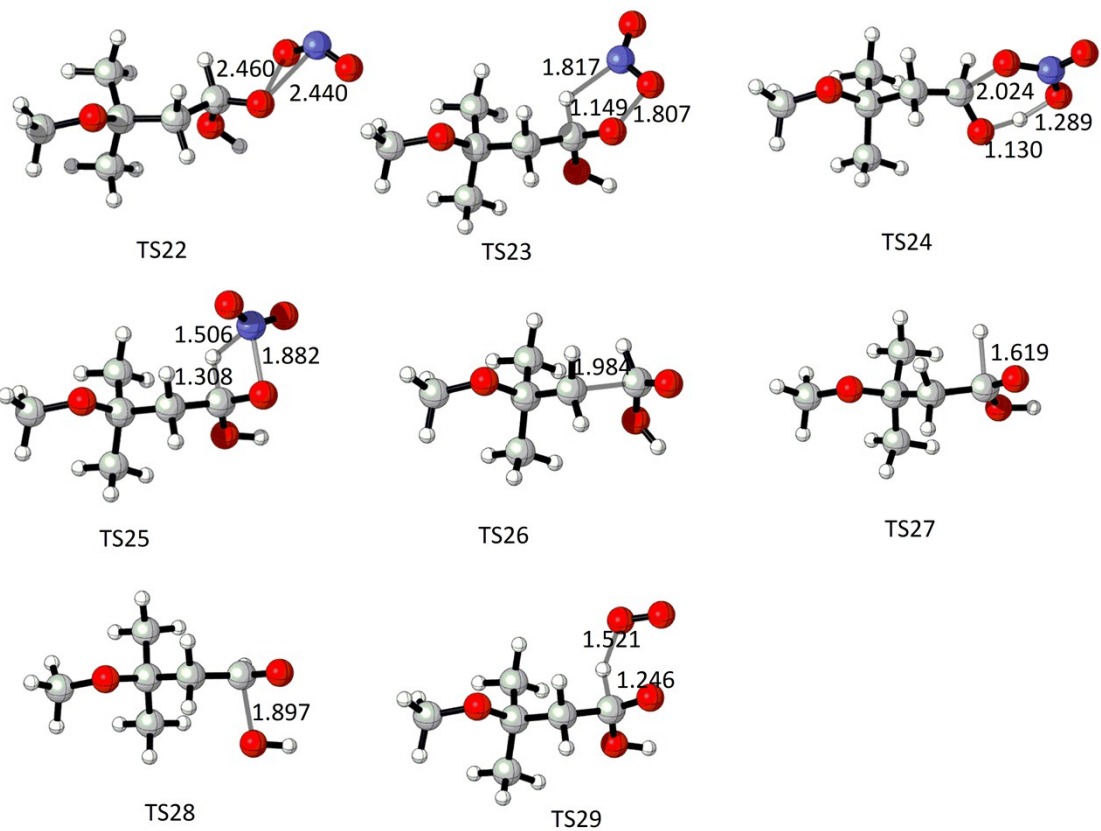

**Figure S1.** (Continued)

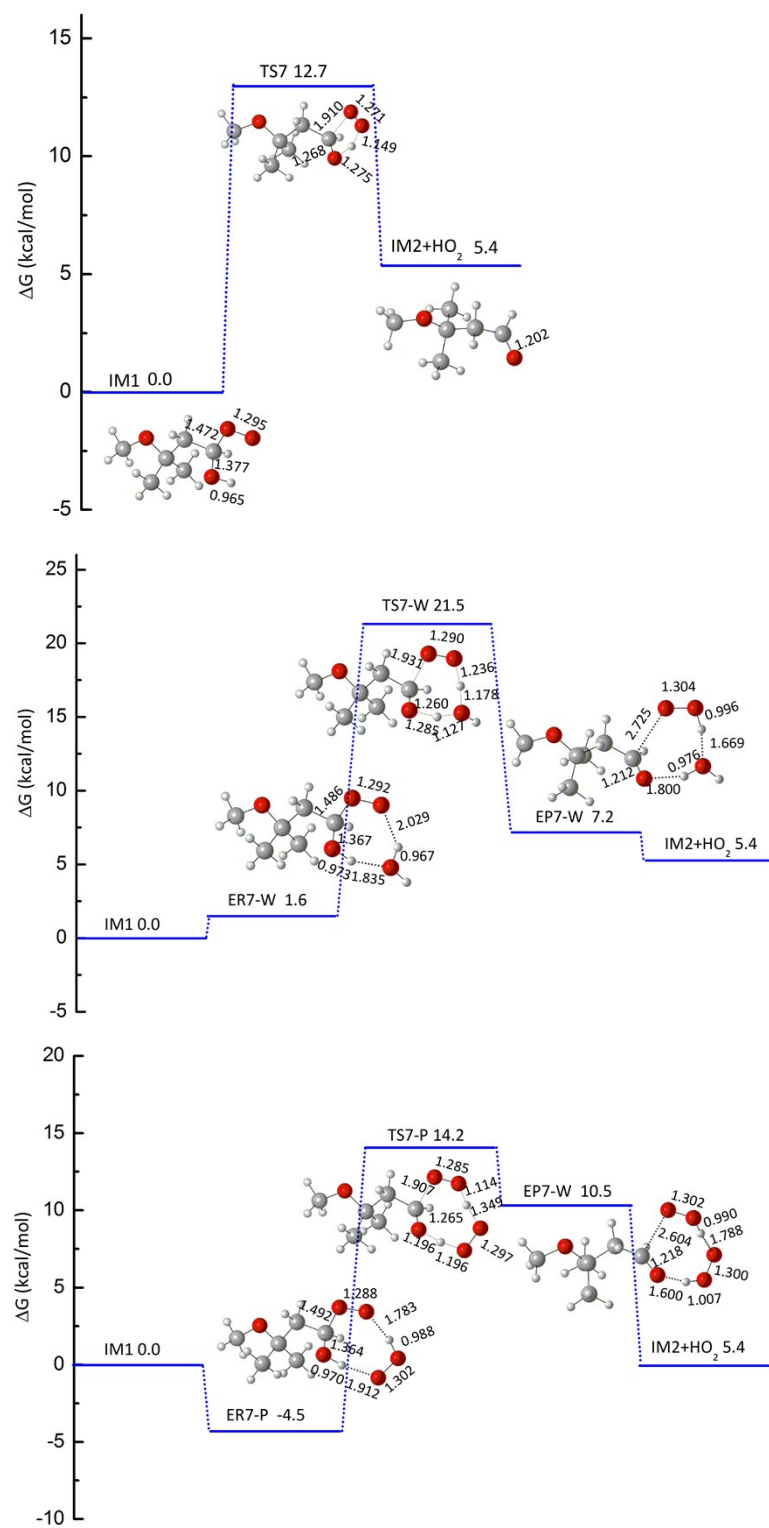

**Figure S2.** Gibbs free energies potential surfaces for the decomposition of the  $\text{CH}_3\text{OC}(\text{CH}_3)_2\text{CH}_2\text{C}(\text{OO}\cdot)\text{HOH}$  ( $\text{IM1}$ ) in the absence and presence of  $\text{H}_2\text{O}$  and  $\text{HO}_2\cdot$  radical. The optimized geometries of the primary species together with certain bond distances (in Å) are also listed.

The expression equation for calculating the rate constants of the reactions. The concentration of the particular catalyst is considered and the catalytic effect of the catalyst on the reaction is measured by the effective rate constant. The specific calculation formula is as follows:

In fact, for the 3M3M1B + OH reaction without catalyst, it can occur according to the two-step mechanism proposed in eqs 1 and 2:

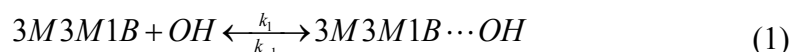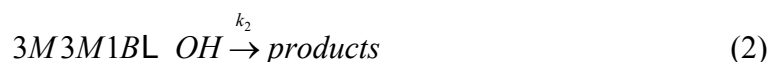

If  $k_1$  and  $k_{-1}$  are the forward and reverse rate constants for the first step, respectively, and  $k_2$  corresponds to the second step, the rate constant for this process is shown by eq. 3 according to the steady-state conditions.<sup>1</sup>

$$k = \frac{k_1 k_2}{k_{-1} + k_2} \quad (3)$$

Due to the very loose transition state, the entropy change in  $k_{-1}$  is much larger than in the formation of products. Therefore,  $k_{-1}$  is considerably larger than  $k_2$ ,<sup>1-4</sup> and a pseudo equilibrium assumption can be used in the formation of the reactant complex. Hence, eq. 3 can be represented as

$$k = \frac{k_1}{k_{-1} + k_2} k_2 = k_{eq} k_2 \quad (4)$$

where  $K_{eq}$  and  $k_2$  are the equilibrium constant of the first step and the rate constant of the second step in the reactions, and they can be displayed by eq. 5 and 6, respectively.

$$k_{eq} = \frac{\sigma Q_{R_1 \cdots R_2}}{Q_{R_1} Q_{R_2}} \exp\left(\frac{E_{3M3M1B+OH} - E_{3M3M1B \cdots OH}}{RT}\right) \quad (5)$$

$$k_2 = \frac{\kappa \sigma}{\beta h} \frac{Q_{TS}}{Q_{RC}} \exp\left(-\frac{E_{TS} - E_{3M3M1B \cdots OH}}{RT}\right) \quad (6)$$

The total rate constant  $k$  can be obtained as

$$k = k_2 \frac{\sigma Q_{R_1 \cdots R_2}}{Q_{R_1} Q_{R_2}} \exp\left(\frac{E_{3M3M1B+OH} - E_{3M3M1B \cdots OH}}{RT}\right) \quad (7)$$

where  $\sigma$  is the symmetry factor;  $\beta$  equals the reciprocal of Boltzmann's constant;  $h$



is Planck's constant;  $\kappa$  is the tunneling factor;  $Q_{ER}$  and  $Q_{TS}$  are partition functions for the reactant complexes and transition state, respectively.

For the reaction assisted by water, ammonia, formic acid or sulfur acid, the following three steps have been taken into account:

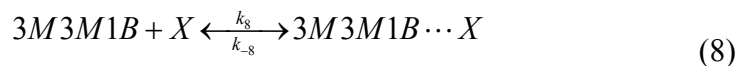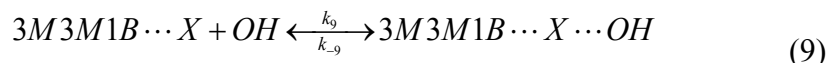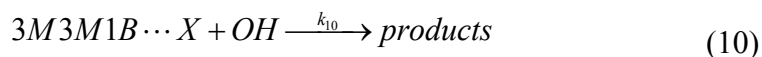

According to Fliegl<sup>5</sup> and Sinha<sup>6</sup>, the above reaction sequence is typically viewed as one involving the formation of the three-body complex prereactive collision complex, which then undergoes unimolecular reaction. From the energy information, it can be concluded that reaction 10 is the rate-determining step, and the rate can be expressed as

$$\frac{d[p]}{dt} = k_{10}[3M3M1B \cdots X \cdots OH] \quad (11)$$

Applying a steady-state approximation to  $3M3M1B \cdots X \cdots OH$  and assuming that it is in equilibrium with the reactants and by assuming that the equilibrium of reaction 6 is not inferred by reaction 9, then

$$[3M3M1B \cdots X \cdots OH] = \frac{k_9[3M3M1B \cdots X][OH]}{k_{-9} + k_{10}} \quad (12)$$

where  $[3M3M1B \cdots X] = K_{eq8}[3M3M1B][X]$ . Because  $k_{-9}$  is larger than  $k_{10}$ , eq 12 can be expressed as

$$[3M3M1B \cdots X \cdots OH] = \frac{k_9 K_{eq8}[3M3M1B][X][OH]}{k_{-9}} \quad (13)$$

$$[3M3M1B \cdots X \cdots OH] = K_{eq8}K_{eq9}[3M3M1B][X][OH] \quad (14)$$

Consequently, eq. 11 can be given as

$$\frac{d[p]}{dt} = k_{10} K_{eq8}K_{eq9}[3M3M1B][X][OH] \quad (15)$$

In the end,, the rate constant  $k$  for the total reaction is obtained by eq. 16

$$k = k_{10} K_{\text{eq}8} K_{\text{eq}9} [X] \quad (16)$$

where  $K_{\text{eq}8}$  and  $K_{\text{eq}9}$  are the equilibrium constants for reactions 8 and 9, respectively,  $k_{10}$  is the rate constant of reaction 10, and  $[X]$  is the atmospheric concentration of catalyst.

If reaction 8 is not taken into account, the rate constants for the title reaction assisted by catalyst can be represented as

$$k' = K_{\text{eq}9} k_{10} \quad (17)$$

## References

- (1) Singleton, D. L.; Cvetanovic, R. J. Temperature Dependence of  $\text{CH}_3\text{O}_2\cdot + \text{HO}_2\cdot \rightarrow \text{CH}_3\text{O}_2\text{H} + \text{O}_2$  reaction in the gas phase. Computational Evidence for the Formation of a Hydrogen-Bonded Diradical Complex. *J. Phys. Chem. A* 2006, 110, 6073–6082.
- (2) Galano, A.; Alvarez-Idaboy, J. R.; Ruiz-Santoyo, M. E.; Vivier-Bunge, A. Glycolaldehyde + OH Gas Phase Reaction: A Quantum Chemistry + CVT/SCT Approach. *J. Phys. Chem. A* 2005, 109, 169–180.
- (3) Alvarez-Idaboy, J. R.; Mora-Diez, N.; Vivier-Bunge, A. A Quantum Chemical and Classical Transition State Theory Explanation of Negative Activation Energies in OH Addition To Substituted Ethenes. *J. Am. Chem. Soc.* 2000, 122, 3715–3720.
- (14) Sun, H.; Law, C. K. Kinetics of Hydrogen Abstraction Reactions of Butene Isomers by OH Radical. *J. Phys. Chem. A* 2010, 114, 12088–12098.
- (5) Fliegl, H.; Glöß, A.; Welz, O.; Olzmann, M.; Klopper, W. Accurate Computational Determination of the Binding Energy of the  $\text{SO}_3 \cdot \text{H}_2\text{O}$  complex. *J. Chem. Phys.* 2006, 125, 054312(1–7).
- (6). Montu K. Hazra and Amitabha Sinha. Formic Acid Catalyzed Hydrolysis of  $\text{SO}_3$  in the Gas Phase: A Barrierless Mechanism for Sulfuric Acid Production of Potential Atmospheric Importance. *J. Am. Chem. Soc.* 2011, 133, 17444–17453.
